# Supplementary material
Source: Springer Nature journal article supplement (https://www.springermedizin.de/resource/supplementary/12981_2006_68_MOESM3_ESM.pdf/9603756)

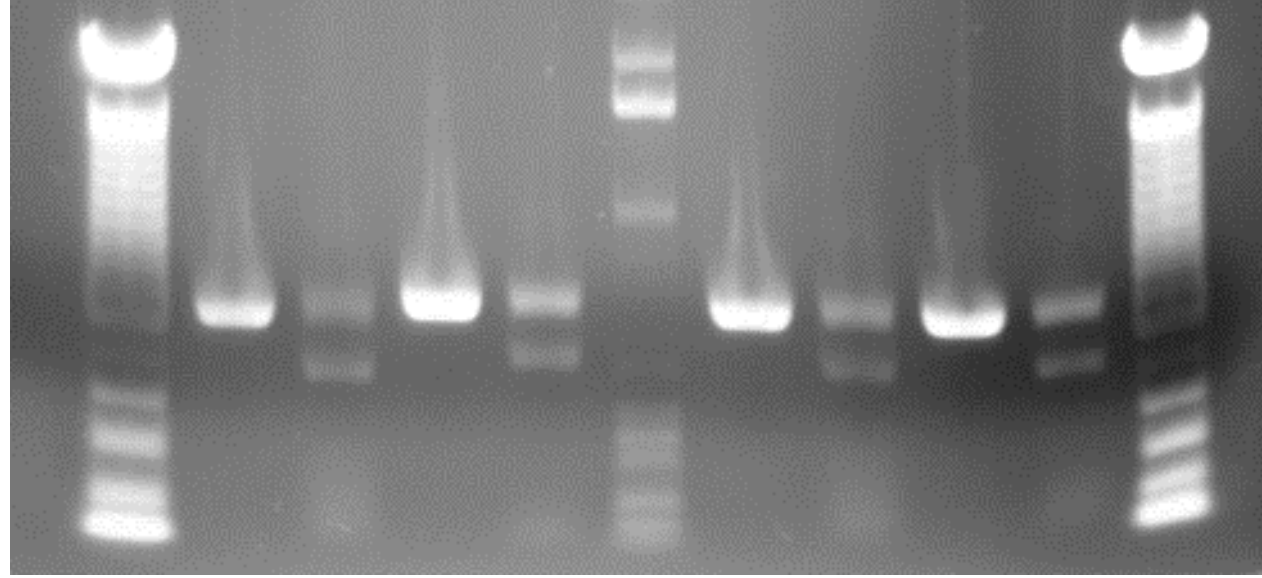

Ladder

Empty

Plasmid

geDNA

70.15

Plasmid

geDNA

Ladder

70.8

Plasmid

geDNA

80.55

Plasmid

geDNA

Ladder

Supplement: MOESM3 [file 9603756]
